# Supplementary material for: Brazilian Agroindustrial Wastes as a Potential Resource of Bioative Compounds and Their Antimicrobial and Antioxidant Activities
Source: MDPI journal article supplement (doi:10.3390/molecules27206876), 2022-10-13

Figure S1.: HPLC chromatograms of ethanolic extracts of: jaboticaba peel (a,b), olive leaf (c,d), pecan nut shell (e,f) and araçá peel (g,h). Phenolic compounds: 1. Gallic acid, 2. Caffeic acid, 3. p-Coumaric acid, 4. Chlorogenic acid, 5. trans-Cinnamic acid, 6. trans-Ferulic acid, 7. Kaempferol, 8. Quercetin, 9. Cyanidin-3-glucoside, 10. Hydroxytyrosol, 11. Tyrosol, 12. Oleuropein and 13. Verbascoside.

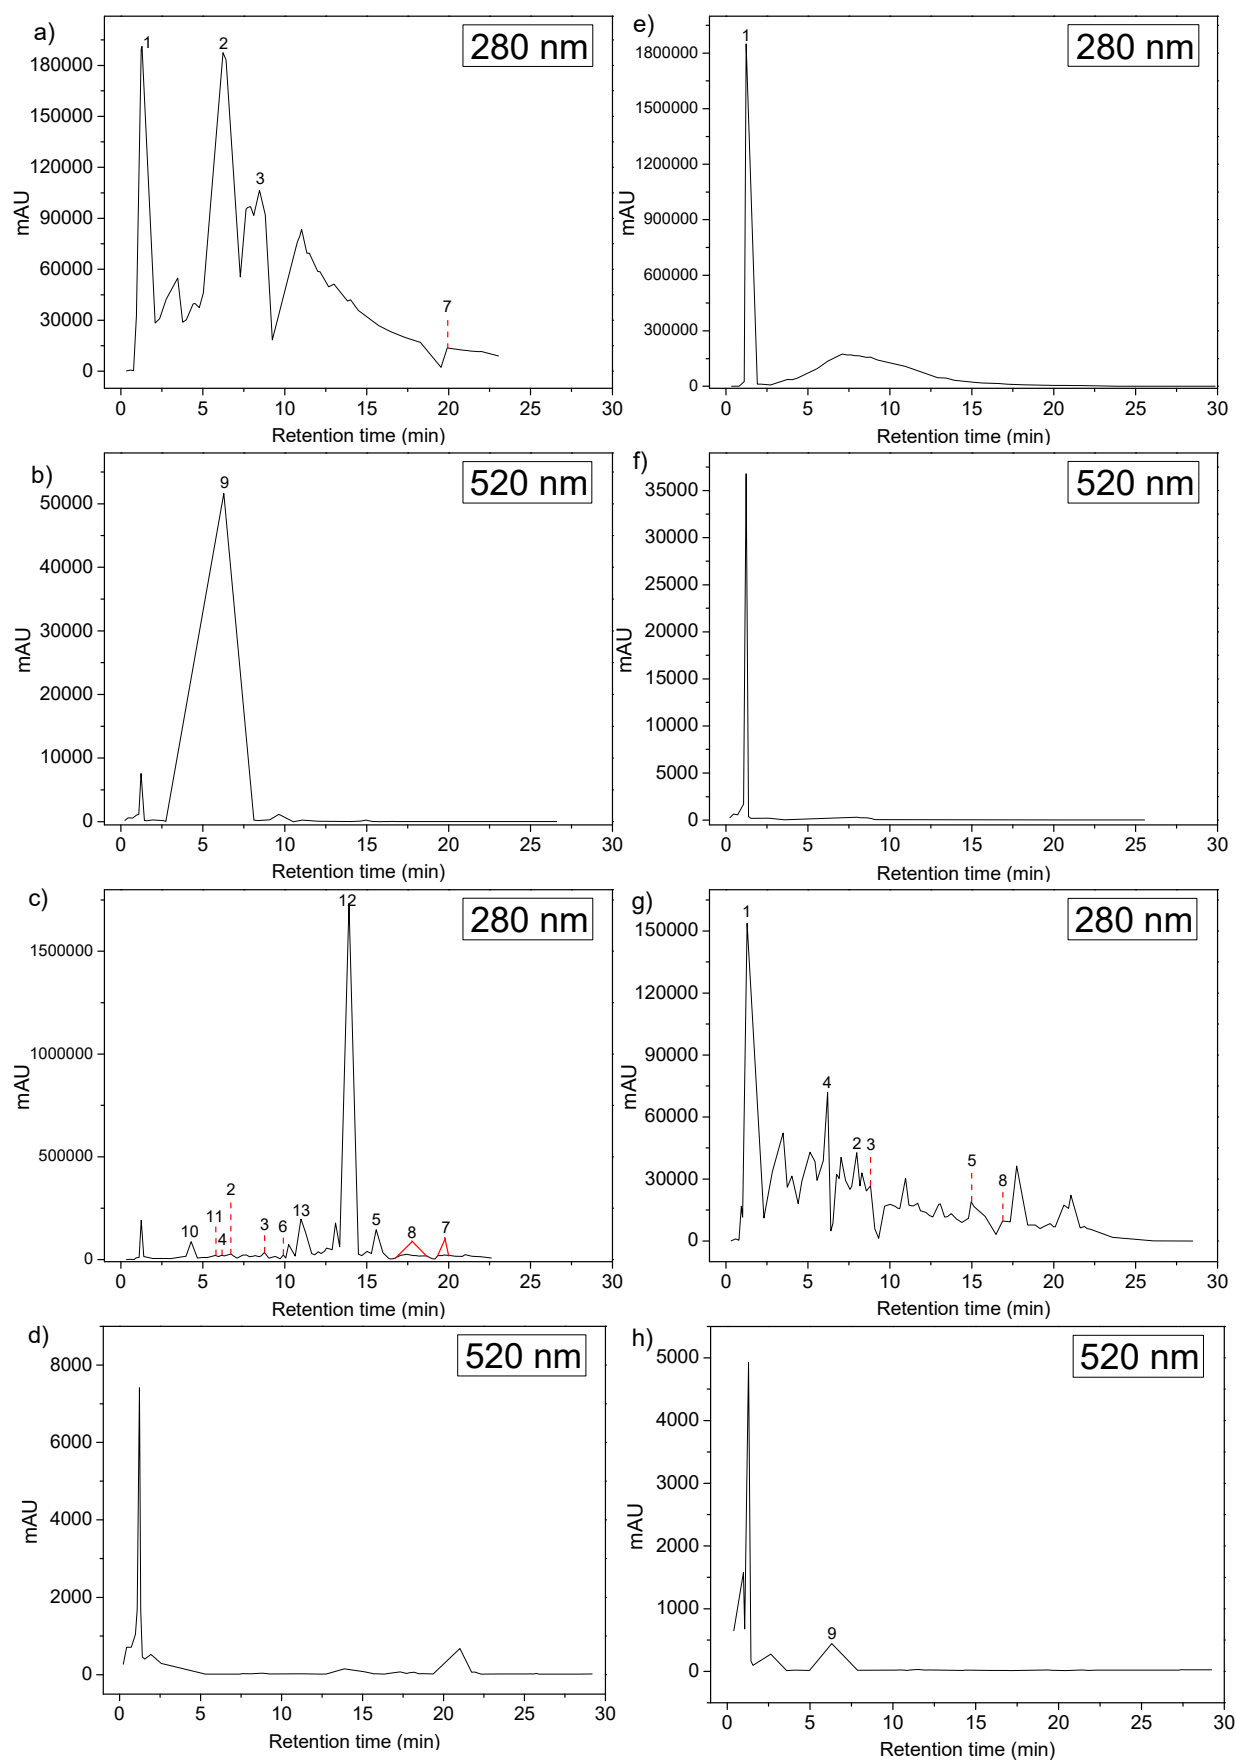

Supplement: s1 [file s1]
